# Supplementary material for: The 5-Me of thyminyl (T) interaction with the neighboring nucleobases dictate the relative stability of isosequential DNA–RNA hybrid duplexes
Source: Royal Society of Chemistry journal article supplement (doi:10.1039/b511139k), 2005-01-01
Supplement: b511139k.pdf [file b511139k.pdf]

## Supplementary Information

### **The 5-Me of thymine (T) interaction with the Neighboring Nucleobases dictate the relative stability of isosequential DNA/RNA hybrid duplexes**

**Subhrangsu Chatterjee, Wimal Pathmasiri, & Jyoti Chattopadhyaya\***

*Department of Bioorganic Chemistry, Box 581, Biomedical Center, Uppsala University, S-751 23 Uppsala, Sweden, E-mail: jyoti@boc.uu.se*

**Table S1.** Calculation of  $\Delta pK_a$  and  $\Delta\Delta G_{pK_a}^{\circ}$  of each mid bp ( $\text{kJ mol}^{-1}$ )<sup>†</sup> values from the model monomeric donors and acceptors (*i.e.* Monomeric base-pair) representing the H-bonding base pairing contribution of the middle base-pairs (mid base-pair *i.e.* excluding the terminal base pairs). The net hydrogen bonding stabilization in different base pairs are different. The  $\Delta\Delta G_{pK_a}^{\circ}$  values are predicting the relative hydrogen bonding stabilization of one base pair over another.

| <b>Monomeric base-pair</b>                           | <b>dC-rG</b> | <b>rC-dG</b> | <b>dG-rC</b> | <b>rG-dC</b> | <b>dA-U</b>  | <b>rA-T</b> | <b>T-rA</b>  | <b>U-dA</b> |
|------------------------------------------------------|--------------|--------------|--------------|--------------|--------------|-------------|--------------|-------------|
| $\Delta pK_a^{\ddagger}$                             | <b>4.94</b>  | <b>5.35</b>  | <b>5.35</b>  | <b>4.94</b>  | <b>5.43</b>  | <b>6.43</b> | <b>6.43</b>  | <b>5.43</b> |
| $\Delta\Delta G_{pK_a}^{\circ}$ of each mid bp       | <b>28.20</b> | <b>30.60</b> | <b>30.60</b> | <b>28.20</b> | <b>31.1</b>  | <b>36.4</b> | <b>36.4</b>  | <b>31.1</b> |
| $[\Delta\Delta pK_a]_{(DR)-(RD)}$                    | <b>-0.41</b> |              | <b>+0.41</b> |              | <b>-1.00</b> |             | <b>+1.00</b> |             |
| $\Delta\Delta\Delta G_{pK_a}^{\circ}$ of each mid bp | <b>-2.40</b> |              | <b>+2.40</b> |              | <b>-5.30</b> |             | <b>+5.30</b> |             |

<sup>†</sup>See Table S2 for calculation of total free energies for base-pairing using free energies for individual middle base-pairs. <sup>‡</sup> For the free energy determination of the middle bp residues in duplex the  $\Delta G_{pK_a}^{\circ}$  values of the Etp(d/rN)pEt (**6a – 10a**) and (**6b – 10b**) (ref 14) have been used.

<sup>‡</sup> $\Delta pK_a$  for (rG-dC):  $[pK_a]_{7b} - [pK_a]_{10a}$ , for (dG-rC):  $[pK_a]_{7a} - [pK_a]_{10b}$ , for (rC-dG):  $[pK_a]_{7a} - [pK_a]_{10b}$ , for (dC-rG):  $[pK_a]_{7b} - [pK_a]_{10a}$  for (U-dA):  $[pK_a]_{8b} - [pK_a]_{6a}$  and for (T-rA):  $[pK_a]_{9a} - [pK_a]_{6b}$ ; (dA-U):  $[pK_a]_{8b} - [pK_a]_{6a}$  and for (rA-T):  $[pK_a]_{9a} - [pK_a]_{6b}$ ;  $[\Delta\Delta pK_a]_{(DR)-(RD)} = [\Delta pK_a]_{DR} - [\Delta pK_a]_{RD}$

**Table S2.** Calculation of the  $\Delta\Delta G_{pKa}^{\circ}$  of each terminal bp ( $\text{kJ mol}^{-1}$ )<sup>†</sup> values from the model monomeric donors and acceptors to represent the H-bonding contribution of the base pairing of terminal base-pairs (3'→5') in DNA-RNA and RNA-DNA hybrid duplexes.

| <b>Terminal base-pair</b>                      | <b>dC<sup>3'</sup>-<br/>rG<sup>5'</sup></b> | <b>rC<sup>3'</sup>-<br/>dG<sup>5'</sup></b> | <b>dG<sup>3'</sup>-<br/>rC<sup>5'</sup></b> | <b>rG<sup>3'</sup>-<br/>dC<sup>5'</sup></b> | <b>dA<sup>3'</sup>-<br/>U<sup>5'</sup></b> | <b>rA<sup>3'</sup>-<br/>T<sup>5'</sup></b> | <b>T<sup>3'</sup>-<br/>rA<sup>5'</sup></b> | <b>U<sup>3'</sup>-<br/>dA<sup>5'</sup></b> |
|------------------------------------------------|---------------------------------------------|---------------------------------------------|---------------------------------------------|---------------------------------------------|--------------------------------------------|--------------------------------------------|--------------------------------------------|--------------------------------------------|
| $\Delta pK_a$                                  | <b>4.92</b>                                 | <b>5.16</b>                                 | <b>5.75</b>                                 | <b>5.15</b>                                 | <b>5.38</b>                                | <b>6.24</b>                                | <b>7.01</b>                                | <b>5.91</b>                                |
| $\Delta\Delta G_{pKa}$ for terminal base-pairs | <b>28.1</b>                                 | <b>29.4</b>                                 | <b>32.9</b>                                 | <b>29.5</b>                                 | <b>30.8</b>                                | <b>35.3</b>                                | <b>40.0</b>                                | <b>33.80</b>                               |
| $\Delta\Delta pK_a$ [DR-RD]                    | <b>-0.24</b>                                |                                             | <b>0.60</b>                                 |                                             | <b>-0.86</b>                               |                                            | <b>1.10</b>                                |                                            |
| $\Delta\Delta\Delta G_{pKa}$ [DR-RD]           | <b>-1.3</b>                                 |                                             | <b>3.4</b>                                  |                                             | <b>-4.5</b>                                |                                            | <b>6.2</b>                                 |                                            |

<sup>†</sup> See Table S2 for calculation of total free energies for base-pairing using free energies for individual terminal base-pairs. For the 3'- or 5'-terminal base-pairing in duplex the  $\Delta G_{pKa}^{\circ}$  values of the (d/rN)pEt (**1a – 5a**) and (**1b – 5b**) and Etp(d/rN)pEt (**6a – 10a**) and (**6b – 10b**) (ref 14) have been used. We have used Etp(d/rN)pEt (**6a – 10a**) and (**6b – 10b**) as the model for the 5'-phosphate since 3'-phosphate group in the bis-phosphate do not have any influence on the  $pK_a$  of the constituent nucleobase.

**Table S3.** Calculation for  $\Sigma\Delta pK_a$  for all fourteen sequences (**1 - 14**)<sup>4</sup> in **RR**, **DD**, **DR**, and **RD** combination (shown in the right four columns) based on the  $pK_a$ s of the middle and terminal base pairs. The H-bonding in the **RR** duplexes are generally more stable (with some rare exception, *e.g.* **8<sub>RR</sub>/8<sub>DD</sub>/8<sub>DR</sub>/8<sub>RD</sub>**) than those of the **DD**, **DR** or **RD** because their  $\Sigma\Delta pK_a$  are relatively smaller.

| Sequence <sup>a</sup>                                                    | Duplex Sequences <sup>a</sup>                       | $\Sigma\Delta pK_a$<br>RR <sup>c</sup> | $\Sigma\Delta pK_a$<br>DD <sup>c</sup> | $\Sigma\Delta pK_a$<br>DR <sup>c</sup> | $\Sigma\Delta pK_a$<br>RD <sup>c</sup> |
|--------------------------------------------------------------------------|-----------------------------------------------------|----------------------------------------|----------------------------------------|----------------------------------------|----------------------------------------|
| <b>(1<sub>RR</sub>/1<sub>DD</sub>/1<sub>DR</sub>/1<sub>RD</sub>)</b>     | 5'-TCCCTCCTCTCC<br>3'-AGGGAGGAGAGG                  | 62.38                                  | 66.70                                  | 65.03                                  | 64.28                                  |
| <b>(2<sub>RR</sub>/2<sub>DD</sub>/2<sub>DR</sub>/2<sub>RD</sub>)</b>     | 5'-CCTTCCCTT<br>3'-GGAAGGGAA                        | 48.35                                  | 52.07                                  | 51.23                                  | 49.35                                  |
| <b>(3<sub>RR</sub>/3<sub>DD</sub>/3<sub>DR</sub>/3<sub>RD</sub>)</b>     | 5'-TTCCCTTCC<br>3'-AAGGGAAGG                        | 47.26                                  | 50.98                                  | 50.21                                  | 48.23                                  |
| <b>(4<sub>RR</sub>/4<sub>DD</sub>/4<sub>DR</sub>/4<sub>RD</sub>)</b>     | 5'-GCTCTCTGGC<br>3'-CGAGAGACCG                      | 51.85                                  | 55.17                                  | 54.89                                  | 52.30                                  |
| <b>(5<sub>RR</sub>/5<sub>DD</sub>/5<sub>DR</sub>/5<sub>RD</sub>)</b>     | 5'-CTCGTAC CTTCCGGTCC<br>3'-GAGCATGGAAGGCCAGG       | 89.02                                  | 95.42                                  | 93.36                                  | 91.41                                  |
| <b>(6<sub>RR</sub>/6<sub>DD</sub>/6<sub>DR</sub>/6<sub>RD</sub>)</b>     | 5'-CTCGTACCTTTCCGGTCCC<br>3'-GAGCATGG AAAGGCCAGG    | 94.55                                  | 101.71                                 | 99.79                                  | 96.84                                  |
| <b>(7<sub>RR</sub>/7<sub>DD</sub>/7<sub>DR</sub>/7<sub>RD</sub>)</b>     | 5'-TAGTTATCTCTATCT<br>3'-ATCAATAGAGATAGA            | 81.56                                  | 90.44                                  | 88.29                                  | 84.15                                  |
| <b>(8<sub>RR</sub>/8<sub>DD</sub>/8<sub>DR</sub>/8<sub>RD</sub>)</b>     | 5'-GCACAGCC<br>3'-CGTGTCCG                          | 41.28                                  | 43.64                                  | 41.11                                  | 43.93                                  |
| <b>(9<sub>RR</sub>/1<sub>DD</sub>/1<sub>DR</sub>/1<sub>RD</sub>)</b>     | 5'-GAGCTCCCAGGC<br>3'-CTCGAGGGTCCG                  | 61.93                                  | 65.65                                  | 63.18                                  | 64.59                                  |
| <b>(10<sub>RR</sub>/10<sub>DD</sub>/10<sub>DR</sub>/10<sub>RD</sub>)</b> | 5'GCCGAGGTCCATGTCGTACGC<br>3'-CGGCTCCAGGTACAGCATGCC | 109.25                                 | 117.01                                 | 113.83                                 | 112.83                                 |
| <b>(11<sub>RR</sub>/11<sub>DD</sub>/11<sub>DR</sub>/11<sub>RD</sub>)</b> | 5'-TGTACGTCACAATA<br>3'-ACATGCAGTGTGAT              | 79.91                                  | 87.67                                  | 83.09                                  | 84.91                                  |
| <b>(12<sub>RR</sub>/12<sub>DD</sub>/12<sub>DR</sub>/12<sub>RD</sub>)</b> | 5'-TATACAAGTTATCTA<br>3'-ATATGTTCAATAGAT            | 81.38                                  | 90.82                                  | 86.15                                  | 86.56                                  |
| <b>(13<sub>RR</sub>/13<sub>DD</sub>/13<sub>DR</sub>/13<sub>RD</sub>)</b> | 5'-CGACTATGCAAAAAC<br>3'-GCTGATACGTTT TTG           | 80.41                                  | 88.09                                  | 81.54                                  | 87.36                                  |
| <b>(14<sub>RR</sub>/14<sub>DD</sub>/14<sub>DR</sub>/14<sub>RD</sub>)</b> | 5'-CGCAAAAAAAAAAACGC<br>3'-GCGTTTTTTTTTTGCG         | 85.94                                  | 94.38                                  | 84.97                                  | 95.79                                  |

<sup>a</sup> Sequences (**1 - 14**) are taken from ref 4. The type of duplexes (*i.e.*, whether **RR**, **DD**, **RD** or **DR**) are referred to as subscript to the sequence number in the text, for example, as **1<sub>RR</sub>**, **1<sub>DD</sub>**, **1<sub>RD</sub>**, and **1<sub>DR</sub>**, and so on. <sup>c</sup>  $\Sigma\Delta pK_a$  includes the sum of  $pK_a$  differences of the middle (Table S4) as well as the terminal base-pairs (Table S5) for **RR/DD/DR** and **RD** duplexes.

**Table S4.** The total number of the middle (**Mid**) and the terminal (**Term**, both  $3'_i$  and  $5'_i$ ) base pairing [dG-rC, dC-rG, T-rA, dA-U in **DR** and rG-dC, rC-dG, rA-T, U-dA in **RD**] in duplexes (**1 – 14**)<sup>4</sup> with their  $\Sigma\Delta pK_a$  values (**DR** and **RD**) of middle plus terminal base-pairs.

| Seq No.                               | Duplex Sequence <sup>a</sup>                            | Total (T/U-A)<br>bp <sup>b</sup> | Total (A-T/U)<br>bp <sup>c</sup> | Mid (T/U-A)<br>bp <sup>d</sup> | Mid (A-T/U)<br>bp <sup>e</sup> | Mid (G-C)<br>bp <sup>f</sup> | Mid (C-G)<br>bp <sup>g</sup> | Term<br>5'<br>3'<br>bp | Term<br>3'<br>5'<br>bp | $\Sigma\Delta pK_a$<br>DR <sup>h</sup> | $\Sigma\Delta pK_a$<br>RD <sup>i</sup> |
|---------------------------------------|---------------------------------------------------------|----------------------------------|----------------------------------|--------------------------------|--------------------------------|------------------------------|------------------------------|------------------------|------------------------|----------------------------------------|----------------------------------------|
| (1 <sub>DR</sub> /1 <sub>RD</sub> )   | 5'-TCCCCTCCTCC-3'<br>3'-AGGGAGGAGAGG-5'                 | 4                                | 0                                | 3                              | 0                              | 0                            | 7                            | T<br>A                 | C<br>G                 | 65.03                                  | 64.28                                  |
| (2 <sub>DR</sub> /2 <sub>RD</sub> )   | 5'-CCTTCCCTT-3'<br>3'-GGAAGGAA-5'                       | 4                                | 0                                | 3                              | 0                              | 0                            | 4                            | C<br>G                 | T<br>A                 | 51.23                                  | 49.35                                  |
| (3 <sub>DR</sub> /3 <sub>RD</sub> )   | 5'-TTCCCTCC-3'<br>3'-AAGGAAAGG-5'                       | 4                                | 0                                | 3                              | 0                              | 0                            | 4                            | T<br>A                 | C<br>G                 | 50.21                                  | 48.23                                  |
| (4 <sub>DR</sub> /4 <sub>RD</sub> )   | 5'-GCTCTCTGGC-3'<br>3'-CGAGAGACCG-5'                    | 3                                | 0                                | 3                              | 0                              | 2                            | 3                            | G<br>C                 | C<br>G                 | 54.89                                  | 52.30                                  |
| (5 <sub>DR</sub> /5 <sub>RD</sub> )   | 5'-CTCGTAC CTTCGGTCC-3'<br>3'-GAGCATGGAAGGCCAGG-5'      | 5                                | 1                                | 5                              | 1                              | 3                            | 6                            | C<br>G                 | C<br>G                 | 93.36                                  | 91.41                                  |
| (6 <sub>DR</sub> /6 <sub>RD</sub> )   | 5'-CTCGTACCCTTCGGTCC-3'<br>3'-GAGCATGG AAAGGCCAGG-5'    | 6                                | 1                                | 6                              | 1                              | 3                            | 6                            | C<br>G                 | C<br>G                 | 99.79                                  | 96.84                                  |
| (7 <sub>DR</sub> /7 <sub>RD</sub> )   | 5'-TAGTTATCTTATCT-3'<br>3'-ATCAATAGATAGA-5'             | 8                                | 3                                | 6                              | 3                              | 1                            | 3                            | T<br>A                 | T<br>A                 | 88.29                                  | 84.15                                  |
| (8 <sub>DR</sub> /8 <sub>RD</sub> )   | 5'-GCACAGCC-3'<br>3'-CGTGTCGG-5'                        | 0                                | 2                                | 0                              | 2                              | 1                            | 3                            | G<br>C                 | C<br>G                 | 41.11                                  | 43.93                                  |
| (9 <sub>DR</sub> /9 <sub>RD</sub> )   | 5'-GAGCTCCCAGGC-3'<br>3'-CTCGAGGTCCG-5'                 | 1                                | 2                                | 1                              | 2                              | 3                            | 4                            | G<br>C                 | C<br>G                 | 63.18                                  | 64.59                                  |
| (10 <sub>DR</sub> /10 <sub>RD</sub> ) | 5'GCCGAGGTCCATGTCTACGC-3'<br>3'CGGCTCCAGGTACAGCATGCG-5' | 4                                | 3                                | 4                              | 3                              | 6                            | 6                            | G<br>C                 | C<br>G                 | 113.83                                 | 112.83                                 |
| (11 <sub>DR</sub> /11 <sub>RD</sub> ) | 5'-TGTACGTCACAACTA-3'<br>3'-ACATGCAGTGTGAT-5'           | 4                                | 5                                | 3                              | 4                              | 2                            | 4                            | T<br>A                 | A<br>T                 | 83.09                                  | 84.91                                  |
| (12 <sub>DR</sub> /12 <sub>RD</sub> ) | 5'-TATACAAAGTTATCTA-3'<br>3'-ATAATGTTCAATAGAT-5'        | 6                                | 6                                | 5                              | 5                              | 1                            | 2                            | T<br>A                 | A<br>T                 | 86.15                                  | 86.56                                  |
| (13 <sub>DR</sub> /13 <sub>RD</sub> ) | 5'-CGACTATGCCAAAAAC-3'<br>3'-GCTGATACGTTT TTTG-5'       | 2                                | 7                                | 2                              | 7                              | 2                            | 2                            | C<br>G                 | C<br>G                 | 81.54                                  | 87.36                                  |
| (14 <sub>DR</sub> /14 <sub>RD</sub> ) | 5'-CGCAAAAAA AAAACCGC-3'<br>3'-GCCGTTTTTTTTTTGGC-5'     | 0                                | 10                               | 0                              | 10                             | 2                            | 2                            | C<br>G                 | C<br>G                 | 84.97                                  | 95.79                                  |

<sup>a</sup>The DNA-RNA (**DR**) and RNA-DNA (**RD**) duplexes, **1 – 14**, are taken from ref. 4 and  $\Sigma\Delta pK_a$  for **DR** and **RD** are used in the plot for Figure 3. <sup>[b]</sup>  
 The total number of middle T/U-A basepairs (bp) for **DR** or **RD**. <sup>c</sup> A-T/U basepairs (bp) for **DR** or **DR** duplexes in each sequence. <sup>a</sup> total no of middle T/U-A base-pairs. <sup>e</sup> total no. of A-T/U base pairs. <sup>[f]</sup> total G-C bp (mid) in **DR** and **RD** (**1-14**), <sup>g</sup> total C-G base pairing (mid) in **DR** or **RD**. <sup>h</sup>  $\Sigma\Delta pK_a$  (**DR**) = [ $\{\Delta pK_a (T-A)\}^*total\ no\ of\ mid\ T-A\ bp + \{\Delta pK_a (A-U)\}^*total\ no\ of\ mid\ A-U\ bp\} + \{\Delta pK_a (dC-G)\}^*total\ no\ of\ mid\ dC-G\ bp + \{\Delta pK_a (dG-C)\}^*total\ no\ of\ mid\ dG-C\ bp + \{\Delta pK_a\ terminal\ base-pair\}(5'3) + \{\Delta pK_a\ terminal\ base-pair\}(3'5') + \Sigma\Delta pK_a (U-A)\}^*total\ no\ of\ mid\ U-A\ bp + \{\Delta pK_a (A-T)\}^*total\ no\ of\ mid\ A-T\ bp\} + \{\Delta pK_a (C-dG)\}^*total\ no\ of\ mid\ C-dG\ bp + \{\Delta pK_a (G-dC)\}^*total\ no\ of\ mid\ G-dC\ bp + \{\Delta pK_a\ terminal\ base-pair\}(5'3) + \{\Delta pK_a\ terminal\ base-pair\}(3'5')]$

**Table S5** : Calculation of total Gibb's free energy for base pairing of all **DR** and **RD** (1-14)<sup>4</sup> reference duplexes.

| Seq.No                                | Duplex Sequence <sup>[a]</sup>                              | $[\Delta G^{\circ}_{bp}]_{DR}$<br>kcal mol <sup>-1</sup> [b] | $[\Delta G^{\circ}_{bp}]_{RD}$<br>kcal mol <sup>-1</sup> [c] | $[\Delta \Delta G^{\circ}_{bp}]_{DR-RD}$<br>kcal mol <sup>-1</sup> [d] |
|---------------------------------------|-------------------------------------------------------------|--------------------------------------------------------------|--------------------------------------------------------------|------------------------------------------------------------------------|
| (1 <sub>DR</sub> /1 <sub>RD</sub> )   | 5'-TCCCCTCCTCCTCC-3'<br>3'-AGGGAGGAGAGG-5'                  | 88.10                                                        | 87.55                                                        | 0.55                                                                   |
| (2 <sub>DR</sub> /2 <sub>RD</sub> )   | 5'-CCTTCCCTT-3'<br>3'-GGAAAGGAA-5'                          | 69.40                                                        | 67.24                                                        | 2.16                                                                   |
| (3 <sub>DR</sub> /3 <sub>RD</sub> )   | 5'-TTCCCCTCCTCC-3'<br>3'-AAGGGAAGG-5'                       | 67.95                                                        | 65.69                                                        | 2.26                                                                   |
| (4 <sub>DR</sub> /4 <sub>RD</sub> )   | 5'-GCTCTCTGGC-3'<br>3'-CGAGAGACCG-5'                        | 74.40                                                        | 71.19                                                        | 3.21                                                                   |
| (5 <sub>DR</sub> /5 <sub>RD</sub> )   | 5'-CTCGTAC CTCCGGTCC-3'<br>3'-GAGCATGGAAGGCCAGG-5'          | 126.60                                                       | 124.38                                                       | 2.22                                                                   |
| (6 <sub>DR</sub> /6 <sub>RD</sub> )   | 5'-CTCGTACCTTCCGGTCC-3'<br>3'-GAGCATGG AAAGGCCAGG-5'        | 135.26                                                       | 131.79                                                       | 3.47                                                                   |
| (7 <sub>DR</sub> /7 <sub>RD</sub> )   | 5'-TAGTTATCTATCT-3'<br>3'-ATCAATAGATAGATA-5'                | 119.57                                                       | 114.38                                                       | 5.19                                                                   |
| (8 <sub>DR</sub> /8 <sub>RD</sub> )   | 5'-GCACAGCC-3'<br>3'-CGTGTCGG-5'                            | 55.93                                                        | 59.60                                                        | -3.19                                                                  |
| (9 <sub>DR</sub> /9 <sub>RD</sub> )   | 5'-GAGCTCCAGGC-3'<br>3'-CTCGAGGGTCCG-5'                     | 85.88                                                        | 87.71                                                        | -1.83                                                                  |
| (10 <sub>DR</sub> /10 <sub>RD</sub> ) | 5'-GCCGAGGTCCAIGTCGTACGC-3'<br>3'-CGGCTCCAGGTACA GCATGCG-5' | 154.57                                                       | 153.31                                                       | 1.26                                                                   |
| (11 <sub>DR</sub> /11 <sub>RD</sub> ) | 5'-TGTAACGTCAAACTA-3'<br>3'-ACATGCAGTGTGAT-5'               | 112.79                                                       | 115.19                                                       | -2.40                                                                  |
| (12 <sub>DR</sub> /12 <sub>RD</sub> ) | 5'-TATACAAGTTATCTA-3'<br>3'-ATATGTTCAATAGAT-5'              | 116.81                                                       | 117.38                                                       | -0.57                                                                  |
| (13 <sub>DR</sub> /13 <sub>RD</sub> ) | 5'-CGACTATGCAAAAAC-3'<br>3'-GCTGATACGTTT TTG-5'             | 110.88                                                       | 118.31                                                       | -7.43                                                                  |
| (14 <sub>DR</sub> /14 <sub>RD</sub> ) | 5'-CGCAAAAAAAAACGC-3'<br>3'-GCGTTTTTTTTTTGGCG-5'            | 115.76                                                       | 129.50                                                       | -13.74                                                                 |

<sup>a</sup> All fourteen sequences, **DR** and **RD (1-14)**. <sup>b</sup> Total base pairing energy in kcal mol<sup>-1</sup> in **DR** using the free energy in monomeric base pairing and following the equation *i.e.*  $[\Delta G_{bp}^{\circ}]_{DR} = \{[\Delta \Delta G_{pKa}^{\circ} \text{ of each mid bp}]_{DR} * \text{Number of middle bp} + \{[\Delta \Delta G_{pKa}^{\circ} \text{ of terminal basepair (3'5')}]_{DR} + \{[\Delta \Delta G_{pKa}^{\circ} \text{ of terminal basepair (5'3')}]_{DR}\}$ , the energy calculation is done in kcal mol<sup>-1</sup> dividing the base-pairing energy (kJmol<sup>-1</sup>) by 4.2. <sup>c</sup> Total base pairing energy in kcal mol<sup>-1</sup> in **RD** using the free energy in monomeric base pairing and following the equation *i.e.*  $[\Delta G_{bp}^{\circ}]_{RD} = \{[\Delta \Delta G_{pKa}^{\circ} \text{ of each mid bp}]_{RD} * \text{Number of middle bp} + \{[\Delta \Delta G_{pKa}^{\circ} \text{ of terminal basepair (3'5')}]_{RD} + \{[\Delta \Delta G_{pKa}^{\circ} \text{ of terminal basepair (5'3')}]_{RD}\}$ . <sup>d</sup> Difference in bp energy (kcal mol<sup>-1</sup>) between **DR** and **RD** with same sequence context. **(1-14)**<sup>[4]</sup>
